# Supplementary material
Source: ML conference proceedings conference paper supplement (https://openaccess.thecvf.com/content/CVPR2026/html/He_Global-Graph_Guided_and_CVPR_2026_paper.html)
Supplement: Supplementary file 1 [file He_Global-Graph_Guided_and_CVPR_2026_supplemental.pdf]

# Appendix

## A. Additional Experiments

### A.1. Comparison Experiments

This section presents the complete comparison results with standard deviation in Tables 1, 2, and 3. The deviation in the report more clearly demonstrates the robustness under different levels of incompleteness and noise. This result further emphasizes the response of different methods to disturbances, thus providing a more comprehensive understanding of the robustness of the proposed GLGC in all experiments.

Table 1. **Clustering Performance Comparison on Incomplete Setting.** We test four datasets with missing rates of [0.1, 0.3, 0.5, 0.7, 1.0]. Bold and underline denote the best and the second-best results. “n/a” signifies that the method could not be executed in that case.

|             | rate | ACC      |                 |          |                 |          |                 |          |                 |          | NMI             |          |                 |          |                 |          |                 |  |
|-------------|------|----------|-----------------|----------|-----------------|----------|-----------------|----------|-----------------|----------|-----------------|----------|-----------------|----------|-----------------|----------|-----------------|--|
|             |      | DSIMVC   | CPSPAN          | RPCIC    | SCSL            | DCG      | GHCMC           | FreeCSL  | GLGC (ours)     | DSIMVC   | CPSPAN          | RPCIC    | SCSL            | DCG      | GHCMC           | FreeCSL  | GLGC (ours)     |  |
| DHA         | 0.1  | 50.1±3.7 | 65.0±2.3        | 57.2±2.3 | 75.2±2.5        | 71.6±3.2 | 71.2±1.4        | 77.4±3.5 | <b>84.6±1.1</b> | 64.6±2.0 | 77.8±0.5        | 68.6±1.1 | 82.0±0.9        | 80.2±1.0 | 76.9±1.2        | 85.6±0.9 | <b>85.9±0.2</b> |  |
|             | 0.3  | 45.0±1.7 | 56.9±3.3        | 47.8±1.9 | 66.2±2.3        | 66.8±2.1 | 68.2±0.8        | 73.3±2.6 | <b>78.7±2.1</b> | 61.3±0.7 | 72.7±1.2        | 58.4±2.0 | 78.6±0.8        | 77.2±1.5 | 73.6±0.3        | 80.5±1.6 | <b>81.7±0.9</b> |  |
|             | 0.5  | 40.3±3.8 | 51.8±2.7        | 34.3±1.9 | 56.9±1.9        | 63.6±2.2 | 59.7±0.8        | 67.2±2.9 | <b>75.5±1.2</b> | 57.4±3.0 | 68.5±0.9        | 45.6±3.6 | 73.3±1.0        | 75.2±1.7 | 67.6±0.9        | 75.5±0.9 | <b>78.9±0.9</b> |  |
|             | 0.7  | 40.6±6.0 | 44.6±1.5        | 23.3±1.7 | 46.2±2.2        | 58.5±2.8 | 51.1±0.7        | 55.0±3.3 | <b>62.4±4.2</b> | 55.0±4.2 | 62.4±2.0        | 33.7±4.2 | 65.2±1.8        | 69.9±3.2 | 61.8±1.6        | 63.9±1.7 | <b>70.3±3.6</b> |  |
|             | 1.0  | n/a      | 32.3±9.9        | 17.0±2.2 | 38.9±1.8        | 23.9±2.2 | 35.9±0.2        | 32.0±1.4 | <b>39.4±2.4</b> | n/a      | 50.0±8.6        | 23.8±2.8 | 54.6±1.2        | 33.8±2.8 | 51.0±0.7        | 45.1±1.3 | <b>56.8±2.5</b> |  |
| LandUse-2I  | 0.1  | 19.6±0.7 | 22.8±0.9        | 23.2±1.4 | 25.9±0.6        | 26.0±1.0 | 27.2±0.3        | 25.9±0.9 | <b>27.5±0.4</b> | 20.7±1.3 | 30.6±0.9        | 29.4±1.1 | 28.2±0.4        | 29.5±1.9 | <b>32.0±0.5</b> | 29.3±1.5 | <u>31.0±0.3</u> |  |
|             | 0.3  | 18.1±0.8 | 21.5±1.0        | 18.5±0.6 | 24.9±0.6        | 25.1±1.2 | <b>27.6±0.4</b> | 24.8±1.1 | <u>26.7±0.5</u> | 19.7±1.1 | 28.9±1.3        | 23.0±0.9 | 24.9±0.4        | 28.6±1.1 | <b>31.3±0.7</b> | 27.7±0.9 | <u>29.8±0.5</u> |  |
|             | 0.5  | 18.5±0.6 | 21.8±1.1        | 18.0±1.2 | 23.1±0.7        | 24.6±1.4 | <u>25.6±0.6</u> | 23.7±1.1 | <b>26.9±0.6</b> | 20.0±1.2 | 28.3±1.0        | 22.1±0.8 | 23.3±0.4        | 26.7±1.2 | <u>29.0±1.2</u> | 26.7±1.4 | <b>29.8±0.7</b> |  |
|             | 0.7  | 17.9±0.7 | 21.4±1.3        | 16.7±1.9 | 22.1±0.5        | 24.1±0.5 | 23.6±0.9        | 23.3±1.2 | <b>26.5±0.5</b> | 17.7±0.6 | 25.8±1.0        | 19.4±2.0 | 21.3±0.4        | 26.3±1.4 | <u>26.6±1.0</u> | 24.3±1.3 | <b>29.3±0.7</b> |  |
|             | 1.0  | n/a      | 16.6±1.4        | 17.5±1.7 | 17.9±0.4        | 12.9±1.1 | 17.7±0.6        | 16.1±1.1 | <b>19.1±0.5</b> | n/a      | 19.2±2.5        | 18.7±3.7 | 15.9±0.5        | 10.6±0.7 | <u>19.9±0.7</u> | 15.4±1.5 | <b>21.8±0.5</b> |  |
| ProteinFold | 0.1  | 23.5±1.5 | 25.6±1.6        | 23.2±1.8 | <u>31.6±0.9</u> | 25.2±1.0 | 27.7±0.8        | 24.7±1.6 | <b>32.0±1.8</b> | 32.1±1.3 | 32.4±1.8        | 32.1±2.1 | <u>38.8±0.6</u> | 33.8±1.3 | 36.1±0.8        | 34.2±1.9 | <b>42.7±1.1</b> |  |
|             | 0.3  | 22.6±0.9 | 24.8±1.2        | 20.9±2.5 | <u>28.4±1.4</u> | 23.8±1.1 | 25.6±0.9        | 25.4±0.9 | <b>30.2±1.2</b> | 27.9±1.5 | 34.1±1.4        | 28.0±1.8 | <u>35.9±0.6</u> | 31.3±1.2 | 34.8±1.0        | 32.3±1.4 | <b>41.6±0.6</b> |  |
|             | 0.5  | 21.3±1.4 | <u>27.8±1.3</u> | 19.9±1.5 | 27.3±0.7        | 22.0±0.9 | 26.3±0.9        | 24.1±1.7 | <b>30.6±1.5</b> | 25.7±0.7 | <u>36.8±1.9</u> | 29.3±2.1 | 34.4±0.6        | 28.2±0.6 | 34.6±0.8        | 30.7±1.3 | <b>40.8±0.6</b> |  |
|             | 0.7  | 18.2±0.6 | 25.8±1.6        | 20.4±2.2 | 26.6±0.8        | 20.8±0.4 | 22.9±0.2        | 20.8±0.8 | <b>28.7±1.6</b> | 21.5±1.1 | <u>34.6±1.9</u> | 27.3±3.6 | 33.5±0.5        | 27.5±1.1 | 30.8±1.1        | 27.1±1.7 | <b>38.3±0.8</b> |  |
|             | 1.0  | n/a      | <u>25.5±1.3</u> | 17.4±1.4 | 24.5±0.5        | 12.9±3.4 | 22.1±0.5        | 19.7±1.0 | <b>26.7±1.9</b> | n/a      | <u>32.8±1.9</u> | 21.7±2.4 | 29.7±0.6        | 13.0±1.4 | 28.1±1.4        | 25.7±1.2 | <b>35.2±1.6</b> |  |
| ALOI        | 0.1  | 41.6±1.0 | 67.3±2.4        | 76.3±1.3 | 55.9±1.0        | 60.5±1.0 | 69.1±0.9        | 87.1±1.5 | <b>89.2±1.4</b> | 68.6±0.2 | 84.0±0.8        | 88.1±0.6 | 72.1±0.3        | 85.3±0.6 | 81.5±0.3        | 93.0±0.3 | <b>93.8±0.6</b> |  |
|             | 0.3  | 39.7±1.4 | 67.7±1.2        | 68.4±2.9 | 42.4±1.0        | 58.1±1.6 | 63.8±0.9        | 84.0±0.8 | <b>88.5±0.6</b> | 65.6±0.6 | 84.5±0.4        | 84.6±1.3 | 62.0±0.2        | 83.9±0.4 | 76.6±0.8        | 90.8±0.4 | <b>93.0±0.2</b> |  |
|             | 0.5  | 39.0±2.5 | 65.6±1.6        | 56.9±1.6 | 32.4±0.6        | 52.1±1.2 | 58.8±0.6        | 81.7±1.9 | <b>87.6±0.4</b> | 64.2±1.0 | 83.0±0.8        | 80.0±0.7 | 54.9±0.2        | 80.2±0.6 | 71.6±0.5        | 88.4±0.6 | <b>91.9±0.3</b> |  |
|             | 0.7  | 35.2±1.5 | 67.7±0.5        | 59.8±3.4 | 27.6±0.6        | 43.9±1.3 | 55.1±1.7        | 75.5±1.0 | <b>85.4±0.7</b> | 60.6±0.8 | 83.6±0.4        | 80.8±1.4 | 51.4±0.2        | 74.1±1.6 | 67.2±1.0        | 84.5±0.2 | <b>90.5±0.7</b> |  |
|             | 1.0  | n/a      | <u>66.7±1.2</u> | 45.5±1.5 | 27.2±0.7        | 8.9±0.9  | 44.7±0.8        | 48.1±1.2 | <b>82.8±0.9</b> | n/a      | <u>83.3±0.5</u> | 69.0±0.5 | 50.6±0.2        | 23.3±2.2 | 57.9±1.0        | 67.9±0.9 | <b>87.7±0.3</b> |  |

Table 2. **Clustering Performance Comparison on Noise Setting.** We test four datasets with the noise rates of [0.1, 0.3, 0.5, 0.7, 1.0].

|             | rate | ACC      |          |          |                 |                 |                 |                 |                 |          | NMI      |          |                 |                 |                 |                 |                 |  |
|-------------|------|----------|----------|----------|-----------------|-----------------|-----------------|-----------------|-----------------|----------|----------|----------|-----------------|-----------------|-----------------|-----------------|-----------------|--|
|             |      | DSIMVC   | CPSPAN   | RPCIC    | SCSL            | DCG             | GHCMC           | FreeCSL         | GLGC (ours)     | DSIMVC   | CPSPAN   | RPCIC    | SCSL            | DCG             | GHCMC           | FreeCSL         | GLGC (ours)     |  |
| DHA         | 0.1  | 60.3±2.4 | 60.4±2.8 | 60.3±3.9 | 64.9±2.1        | 68.3±1.8        | 71.1±1.9        | 74.6±4.3        | <b>83.9±2.1</b> | 72.4±2.2 | 77.8±1.5 | 74.6±2.2 | 74.9±0.8        | 79.1±0.6        | 76.9±1.2        | <b>85.2±0.8</b> | <b>85.2±1.3</b> |  |
|             | 0.3  | 59.4±4.0 | 40.9±3.3 | 47.7±2.2 | <u>75.5±2.4</u> | 67.3±3.1        | 58.5±0.9        | 73.8±2.4        | <b>81.3±2.4</b> | 70.9±2.0 | 66.1±2.2 | 67.2±0.5 | 82.5±1.0        | 78.6±1.5        | 66.6±0.6        | 83.0±1.3        | <b>83.6±0.9</b> |  |
|             | 0.5  | 56.9±3.7 | 37.2±1.5 | 38.2±3.5 | 73.6±2.2        | 66.6±5.0        | 52.6±1.7        | 74.7±3.2        | <b>80.5±1.8</b> | 69.4±2.2 | 61.1±1.5 | 59.9±1.9 | <u>81.6±0.7</u> | 77.2±1.8        | 64.6±1.4        | 81.2±0.9        | <b>82.7±1.3</b> |  |
|             | 0.7  | 53.0±2.2 | 36.6±1.5 | 40.7±4.3 | 72.0±2.3        | 65.2±1.5        | 46.7±0.5        | 73.3±1.8        | <b>78.0±3.7</b> | 66.1±2.7 | 53.1±2.1 | 59.4±3.9 | 80.4±0.7        | 76.2±1.6        | 59.4±0.7        | 80.1±1.0        | <b>81.4±1.5</b> |  |
|             | 1.0  | 45.5±4.6 | 34.3±1.6 | 43.4±0.6 | 70.2±2.7        | 63.4±3.5        | 38.3±1.1        | 61.3±5.6        | <b>72.2±2.7</b> | 59.7±2.7 | 49.8±2.0 | 58.6±1.4 | <u>76.2±0.8</u> | 74.5±1.9        | 51.6±1.2        | 73.0±3.0        | <b>77.9±1.9</b> |  |
| LandUse-2I  | 0.1  | 19.8±0.8 | 18.4±1.0 | 19.6±0.9 | 26.1±0.5        | 26.2±1.3        | 25.9±1.1        | 26.8±0.6        | <b>27.3±0.6</b> | 20.7±0.5 | 24.2±1.1 | 25.8±1.0 | 26.9±0.4        | 29.5±1.6        | <u>30.6±0.7</u> | 29.7±0.4        | <b>31.6±0.8</b> |  |
|             | 0.3  | 18.9±0.7 | 16.2±0.6 | 16.1±0.9 | 24.7±0.5        | 24.9±1.4        | 25.4±0.9        | <u>26.3±1.2</u> | <b>27.8±0.6</b> | 19.8±0.7 | 18.9±1.0 | 18.4±1.5 | 25.8±0.7        | 27.9±0.9        | <u>27.7±0.6</u> | <u>28.7±0.8</u> | <b>31.6±0.9</b> |  |
|             | 0.5  | 19.2±0.9 | 14.0±1.0 | 13.7±0.7 | 22.8±0.9        | 24.8±1.1        | 25.0±1.0        | 22.8±1.0        | <b>27.4±0.6</b> | 20.3±0.6 | 12.3±1.2 | 12.9±1.1 | 21.5±1.0        | <u>27.3±0.9</u> | 26.7±1.1        | 24.7±1.2        | <b>30.9±0.5</b> |  |
|             | 0.7  | 17.6±0.5 | 12.4±0.6 | 13.1±1.2 | 23.1±1.2        | <u>25.1±0.7</u> | 24.8±0.8        | 21.0±1.1        | <b>26.1±1.4</b> | 18.1±0.4 | 10.4±0.8 | 10.6±1.6 | 23.5±1.0        | <u>27.7±0.5</u> | 25.6±0.6        | 21.7±0.8        | <b>30.2±1.3</b> |  |
|             | 1.0  | 17.3±1.0 | 11.4±0.6 | 13.7±0.7 | 21.9±0.8        | 21.1±0.4        | 22.5±0.8        | 14.6±0.5        | <b>24.7±0.9</b> | 16.9±0.8 | 7.1±1.0  | 11.1±0.9 | 21.2±0.4        | <u>24.1±0.6</u> | 22.3±0.4        | 12.6±0.8        | <b>27.4±1.0</b> |  |
| ProteinFold | 0.1  | 19.8±0.8 | 18.9±2.7 | 19.8±3.2 | 29.9±0.7        | 22.0±1.1        | 25.5±0.8        | 22.3±1.4        | <b>31.8±2.0</b> | 20.7±0.5 | 16.0±2.5 | 17.5±3.8 | <u>38.2±0.5</u> | 30.6±1.3        | 35.8±1.5        | 31.8±0.9        | <b>43.7±1.4</b> |  |
|             | 0.3  | 18.9±0.7 | 13.3±0.3 | 14.6±1.0 | <u>27.8±0.7</u> | 21.6±0.7        | 25.7±1.3        | 21.1±1.6        | <b>31.7±1.1</b> | 19.8±0.7 | 8.8±0.6  | 10.6±1.5 | <u>34.7±0.7</u> | 27.5±0.8        | 33.6±0.9        | 27.8±1.7        | <b>42.9±0.8</b> |  |
|             | 0.5  | 19.2±0.9 | 13.0±0.4 | 13.0±0.4 | <u>27.4±0.9</u> | 20.7±1.1        | 24.7±1.4        | 18.5±1.7        | <b>31.5±1.3</b> | 20.3±0.6 | 9.2±0.8  | 9.5±0.6  | 32.8±0.6        | 25.7±2.7        | 33.1±1.6        | 24.6±1.3        | <b>42.0±1.4</b> |  |
|             | 0.7  | 17.6±0.5 | 13.0±0.6 | 12.8±0.8 | <u>24.9±0.7</u> | 20.9±0.9        | 23.1±0.4        | 17.5±0.4        | <b>30.5±0.9</b> | 18.1±0.4 | 8.2±1.2  | 8.3±0.9  | 30.1±0.7        | 27.7±0.7        | <u>31.8±1.3</u> | 22.5±0.7        | <b>40.9±0.7</b> |  |
|             | 1.0  | 17.3±1.0 | 12.9±1.0 | 12.7±0.9 | <u>20.8±0.6</u> | 19.7±0.9        | 22.6±1.0        | 13.7±0.6        | <b>29.5±1.2</b> | 16.9±0.8 | 10.6±1.0 | 10.0±1.2 | 26.2±0.7        | 27.3±1.1        | <u>30.3±1.8</u> | 18.5±1.1        | <b>40.3±0.4</b> |  |
| ALOI        | 0.1  | 39.7±1.5 | 49.1±0.6 | 50.2±2.9 | 46.4±0.7        | 58.2±2.4        | 69.1±0.9        | <b>89.4±0.9</b> | 88.5±0.9        | 67.3±0.7 | 70.7±0.6 | 73.8±1.1 | 67.5±0.2        | 82.4±1.3        | 81.5±0.3        | <b>94.2±0.3</b> | 93.2±0.5        |  |
|             | 0.3  | 39.4±1.5 | 24.5±1.7 | 25.1±1.6 | 43.7±0.8        | 51.0±2.5        | 63.8±0.9        | 88.7±0.9        | <b>90.2±0.6</b> | 65.9±0.6 | 49.9±1.8 | 53.0±1.3 | 59.9±0.4        | 73.5±1.3        | 76.6±0.8        | 92.9±0.4        | <b>93.3±0.2</b> |  |
|             | 0.5  | 38.8±1.5 | 13.6±1.1 | 14.1±1.5 | 35.3±0.6        | 40.2±0.5        | 58.8±0.6        | 66.9±1.6        | <b>88.6±0.8</b> | 63.8±0.6 | 35.4±0.7 | 37.1±1.4 | 52.4±0.2        | 64.4±0.6        | 71.6±0.5        | <u>75.6±0.7</u> | <b>91.5±0.3</b> |  |
|             | 0.7  | 34.8±1.6 | 10.1±0.6 | 11.1±0.8 | 22.1±0.8        | 36.6±1.6        | 55.1±1.7        | 44.6±2.1        | <b>86.1±1.0</b> | 60.5±1.2 | 28.2±0.8 | 32.5±1.1 | 38.3±0.3        | 59.8±1.7        | <u>67.2±1.0</u> | 57.2±1.1        | <b>89.0±0.4</b> |  |
|             | 1.0  | 23.7±2.0 | 6.9±0.3  | 10.1±0.4 | 5.7±0.6         | 32.3±1.8        | <u>44.7±0.8</u> | 21.5±1.0        | <b>79.9±2.2</b> | 52.6±1.6 | 20.1±0.6 | 29.3±0.2 | 15.7±1.9        | 56.0±0.8        | <u>57.9±1.0</u> | 34.5±1.1        | <b>83.6±1.2</b> |  |

Table 3. Clustering Performance Comparison on Incomplete + Noise Setting. We test four datasets with rates of [0.1, 0.3, 0.5, 0.7, 1.0].

| Rate        | ACC    |          |          |          |                 |                 |                 |                 | NMI             |          |                 |          |                 |                 |                 |                 |                 |
|-------------|--------|----------|----------|----------|-----------------|-----------------|-----------------|-----------------|-----------------|----------|-----------------|----------|-----------------|-----------------|-----------------|-----------------|-----------------|
|             | DSIMVC | CPSPAN   | RPCIC    | SCSL     | DCG             | GHICMC          | FresCSL         | GLGC (ours)     | DSIMVC          | CPSPAN   | RPCIC           | SCSL     | DCG             | GHICMC          | FresCSL         | GLGC (ours)     |                 |
| DHA         | 0.1    | 60.0±3.5 | 60.0±3.4 | 51.4±3.1 | 72.3±1.8        | 60.9±4.0        | 68.6±1.7        | 74.3±1.9        | <b>77.5±4.6</b> | 70.6±1.7 | 77.1±1.7        | 66.1±2.2 | 81.4±0.7        | 79.5±1.4        | 74.1±1.2        | 82.4±0.7        | <b>82.7±2.4</b> |
|             | 0.3    | 55.1±2.7 | 46.1±4.4 | 35.9±2.9 | 60.9±3.2        | 56.0±3.0        | 50.4±1.2        | 68.1±4.3        | <b>76.2±2.5</b> | 65.6±1.5 | 68.4±1.4        | 49.5±1.7 | 74.4±1.1        | 75.5±1.4        | 59.2±0.9        | 75.8±2.4        | <b>79.8±1.9</b> |
|             | 0.5    | 48.2±4.3 | 45.6±3.3 | 26.0±1.2 | 47.6±2.0        | 50.2±4.7        | 42.1±1.9        | 57.4±3.3        | <b>65.2±5.3</b> | 61.4±1.9 | 64.2±1.2        | 37.4±1.0 | 63.3±1.3        | 67.1±2.5        | 50.4±1.1        | 64.3±2.1        | <b>71.4±3.5</b> |
|             | 0.7    | 41.3±1.7 | 40.4±3.5 | 17.2±1.3 | 34.4±1.5        | 49.4±3.0        | 28.8±1.1        | 41.3±2.5        | <b>54.2±2.3</b> | 54.4±1.9 | <b>63.9±2.1</b> | 25.8±2.1 | 51.2±1.6        | 63.1±1.7        | 37.5±1.5        | 48.5±1.9        | <b>62.8±2.0</b> |
|             | 1.0    | n/a      | 28.8±1.3 | 18.1±1.0 | 31.9±1.6        | 18.9±1.7        | 17.8±1.0        | 26.2±1.0        | <b>34.3±2.0</b> | n/a      | 41.1±1.8        | 26.2±0.9 | 43.0±0.7        | 23.7±1.8        | 34.2±1.1        | 23.9±1.2        | <b>47.8±1.2</b> |
| LandUse-21  | 0.1    | 19.3±1.3 | 18.8±1.1 | 19.9±1.5 | <u>26.2±0.5</u> | 26.1±0.7        | 25.8±0.4        | 25.5±0.9        | <b>27.7±0.9</b> | 20.7±1.0 | 24.5±0.7        | 24.3±1.4 | 27.6±0.5        | 28.8±1.2        | 30.0±1.1        | 28.7±0.2        | <b>31.1±0.6</b> |
|             | 0.3    | 18.2±0.5 | 14.3±0.3 | 13.3±0.9 | 24.7±0.5        | <u>25.2±0.5</u> | 24.5±0.6        | 24.3±0.6        | <b>26.8±0.5</b> | 19.0±0.8 | 14.7±0.9        | 12.0±0.7 | 24.3±0.5        | <u>27.8±0.3</u> | 25.5±0.8        | 25.0±0.8        | <b>29.8±0.3</b> |
|             | 0.5    | 18.1±0.9 | 12.0±1.0 | 11.6±1.0 | 23.8±0.6        | <u>24.0±1.2</u> | 22.5±1.5        | 21.3±1.3        | <b>25.9±0.5</b> | 18.9±0.9 | 9.7±1.4         | 8.0±0.9  | 22.0±0.5        | <u>25.1±0.8</u> | 22.0±0.8        | 19.0±1.0        | <b>28.6±0.7</b> |
|             | 0.7    | 16.2±0.6 | 11.4±0.5 | 11.2±0.4 | 20.1±0.9        | <u>21.9±1.0</u> | 18.6±1.3        | 16.7±1.0        | <b>24.3±1.1</b> | 15.4±0.6 | 7.3±0.7         | 7.2±0.8  | 18.0±1.0        | <u>22.2±0.8</u> | 16.2±0.6        | 14.2±1.2        | <b>25.7±0.8</b> |
|             | 1.0    | n/a      | 11.1±0.6 | 11.7±0.6 | <b>17.1±0.9</b> | 11.9±0.8        | <u>15.3±0.2</u> | 12.1±0.3        | <b>17.1±0.5</b> | n/a      | 5.5±0.7         | 7.3±0.7  | <u>15.9±0.7</u> | 9.0±1.1         | 11.6±0.2        | 7.8±0.5         | <b>17.3±1.0</b> |
| ProteinFold | 0.1    | 22.5±1.4 | 16.6±1.6 | 16.5±1.7 | <u>30.4±0.9</u> | 21.6±2.3        | 21.8±1.0        | 24.2±1.8        | <b>31.3±0.8</b> | 30.5±0.8 | 12.3±1.7        | 13.8±4.0 | <u>38.5±0.8</u> | 29.4±2.1        | 24.8±0.8        | 33.4±1.9        | <b>42.2±0.6</b> |
|             | 0.3    | 21.8±1.0 | 13.6±0.8 | 13.5±1.0 | <u>28.2±1.2</u> | 19.7±1.1        | 21.5±0.7        | 20.4±1.8        | <b>29.7±1.2</b> | 27.2±1.1 | 8.6±0.8         | 9.3±2.0  | <u>36.5±0.5</u> | 25.1±1.6        | 23.3±0.4        | 24.8±2.1        | <b>39.7±0.7</b> |
|             | 0.5    | 18.9±2.5 | 13.0±0.5 | 12.8±0.7 | <u>26.8±0.9</u> | 18.7±1.4        | 20.8±0.4        | 17.2±0.2        | <b>29.3±0.9</b> | 24.2±1.8 | 8.0±1.1         | 7.9±1.0  | <u>33.0±0.6</u> | 24.0±1.1        | 20.8±0.4        | 21.2±0.7        | <b>38.4±1.5</b> |
|             | 0.7    | 16.7±0.4 | 13.0±0.7 | 12.6±0.7 | <b>26.7±1.0</b> | 18.0±1.0        | 20.5±0.6        | 15.5±0.8        | <b>26.1±1.1</b> | 22.7±1.6 | 8.6±0.9         | 7.8±0.8  | <u>33.1±0.7</u> | 22.9±2.0        | 20.1±0.6        | 18.9±0.8        | <b>35.7±1.4</b> |
|             | 1.0    | n/a      | 12.4±0.5 | 12.6±0.6 | <u>24.1±1.0</u> | 12.3±3.9        | 18.2±0.8        | 13.5±0.8        | <b>24.2±1.2</b> | n/a      | 10.1±0.8        | 10.1±1.3 | <u>30.2±0.7</u> | 12.5±2.0        | 18.4±0.7        | 16.2±1.0        | <b>31.8±1.3</b> |
| ALOI        | 0.1    | 42.2±0.8 | 48.5±2.6 | 51.0±1.9 | 49.9±1.3        | 46.7±2.2        | 65.4±1.6        | <b>88.1±0.8</b> | <u>87.4±1.1</u> | 69.2±0.2 | 69.8±1.5        | 72.8±1.2 | 67.2±0.3        | 74.9±1.9        | 79.2±0.7        | <b>93.0±0.3</b> | <u>92.4±0.4</u> |
|             | 0.3    | 36.6±1.7 | 27.2±1.2 | 27.7±2.1 | 32.5±0.8        | 39.6±1.7        | 56.2±1.3        | <u>72.2±2.6</u> | <b>86.1±0.9</b> | 63.8±0.4 | 51.1±1.2        | 53.9±1.2 | 51.3±0.2        | 64.6±0.9        | 71.0±0.5        | <u>80.0±1.3</u> | <b>89.3±0.3</b> |
|             | 0.5    | 29.1±0.8 | 14.1±1.1 | 15.0±1.0 | 16.8±0.5        | 31.3±1.6        | 48.1±1.0        | 39.5±1.5        | <b>79.4±0.7</b> | 57.8±0.5 | 35.2±1.2        | 38.6±0.5 | 37.1±0.4        | 54.7±0.7        | 61.1±0.5        | 53.2±0.5        | <b>82.9±0.5</b> |
|             | 0.7    | 22.8±0.5 | 10.1±0.7 | 11.5±0.3 | 13.1±0.3        | 22.8±0.4        | <u>39.0±0.5</u> | 21.3±0.9        | <b>69.8±1.0</b> | 49.1±1.4 | 26.8±0.3        | 32.9±0.4 | 31.6±0.2        | 43.5±0.4        | <u>50.6±0.4</u> | 37.0±1.1        | <b>74.7±0.6</b> |
|             | 1.0    | n/a      | 7.3±0.4  | 12.2±0.3 | 7.8±0.3         | 3.6±0.2         | <u>26.2±1.2</u> | 12.1±0.5        | <b>48.5±0.9</b> | n/a      | 18.8±0.6        | 32.4±0.8 | 21.4±0.7        | 8.6±0.5         | <u>36.7±0.9</u> | 27.7±0.9        | <b>55.1±0.4</b> |

## A.2. Training loss and performance

In Figures 1, 2 and 3 we plot the training loss and clustering performance of GLGC under incomplete, noise, and incomplete + noise settings. Across all datasets, the loss curves consistently decrease in a smooth and monotonic manner, indicating that the optimization process remains stable throughout training. Meanwhile, the curves of ACC, NMI, and ARI show continuous improvement as the number of epochs increases, suggesting that GLGC is able to progressively refine the learned representations and uncover more reliable cluster structures. These trends jointly demonstrate that the proposed method converges reliably and exhibits strong robustness under various challenging multi-view scenarios.

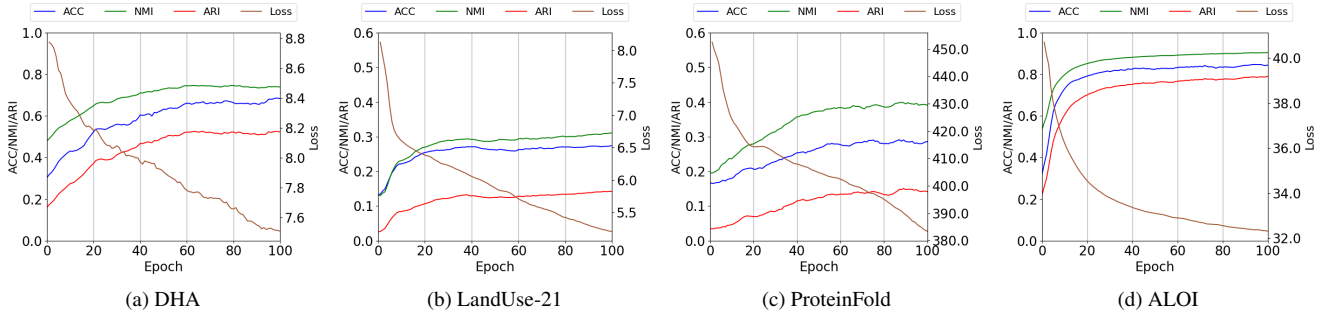

Figure 1. The training loss curve and clustering performance of GLGC on incomplete setting.

## A.3. Parameter analysis

In the proposed method, we employ the non-negative parameters  $\alpha$  and  $\beta$  to balance the contributions of each loss component. To investigate their influence under different experimental settings, we conduct clustering experiments across all datasets by varying the parameter values across a broad range, and the corresponding results are presented in Figures 4, 5, and 6. As shown in the figures, the optimal choices of  $\alpha$  and  $\beta$  differ slightly across datasets and task scenarios (incomplete, noise, and incomplete+noise), which aligns with expectation. The clustering performance remains stable within wide parameter intervals—e.g.,  $\alpha \in [0.05, 0.5]$  and  $\beta \in [0.5, 2.0]$ —demonstrating minimal sensitivity to these trade-off parameters. In all experiments, we set  $\alpha = 0.1$  and  $\beta = 1.0$  in all experiments.

Furthermore, Figures 7, 8 and 9 present the influence of the positive and negative sample ratio parameters ( $pos, neg$ ) within our contrastive learning mechanism. Similar to the behavior observed for  $\alpha$  and  $\beta$ , the ACC values remain stable across diverse ratio configurations. This demonstrates that the contrastive objective of GLGC is inherently robust and does not heavily rely

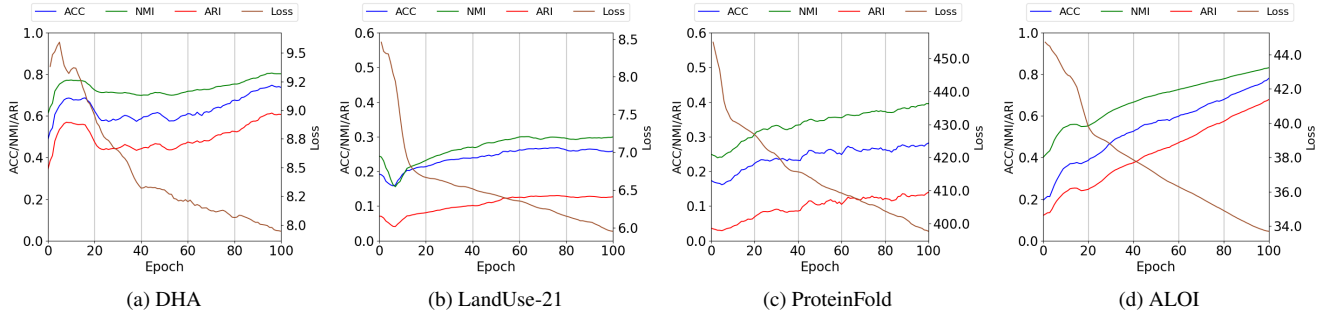

Figure 2. The training loss curve and clustering performance of GLGC on noise setting.

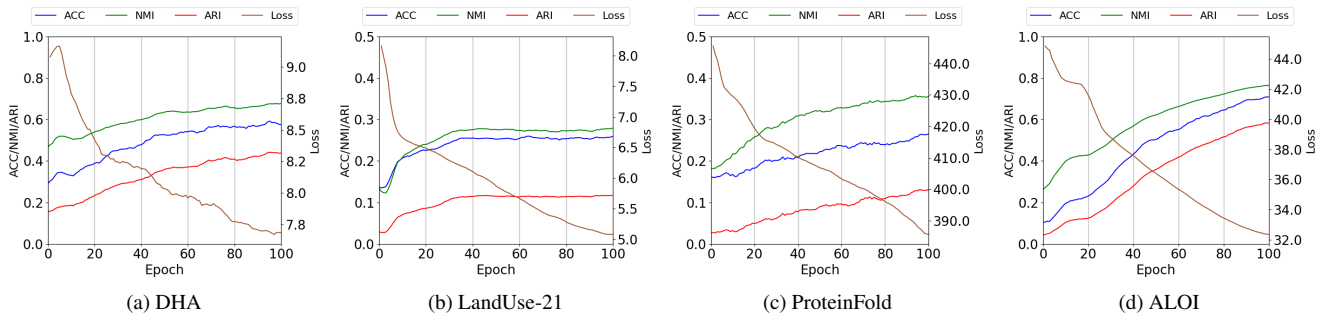

Figure 3. The training loss curve and clustering performance of GLGC on incomplete + noise setting.

on precise ratio selection. The insensitivity of GLGC to these parameters confirms the stability of the proposed optimization strategy under incomplete, noisy, and incomplete+noise.

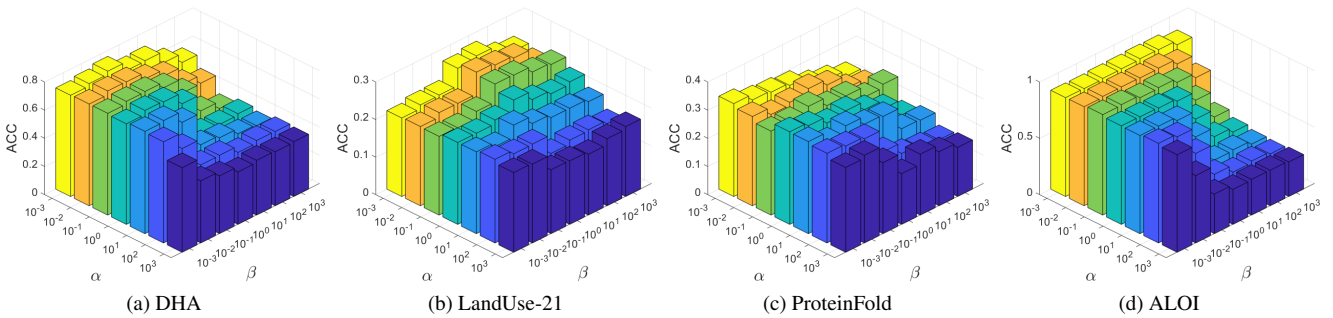

Figure 4. ACC vs.  $\{\alpha, \beta\}$  of GLGC on incomplete setting.

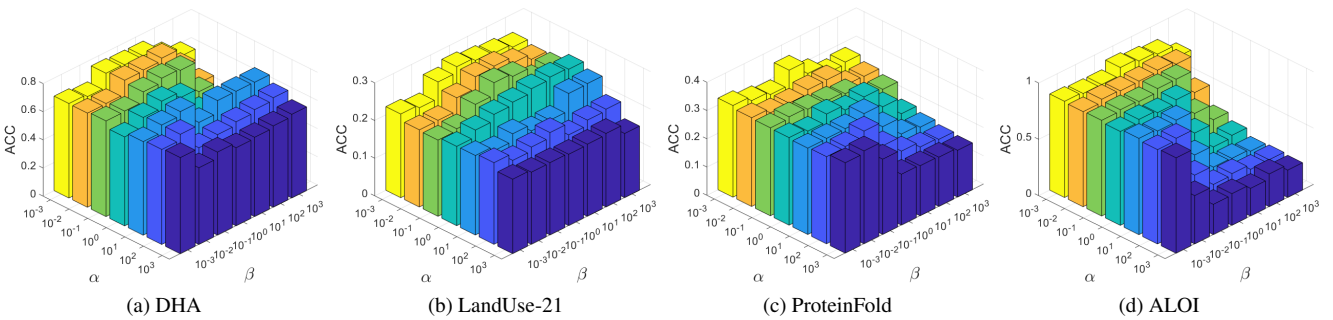

Figure 5. ACC vs.  $\{\alpha, \beta\}$  of GLGC on noise setting.

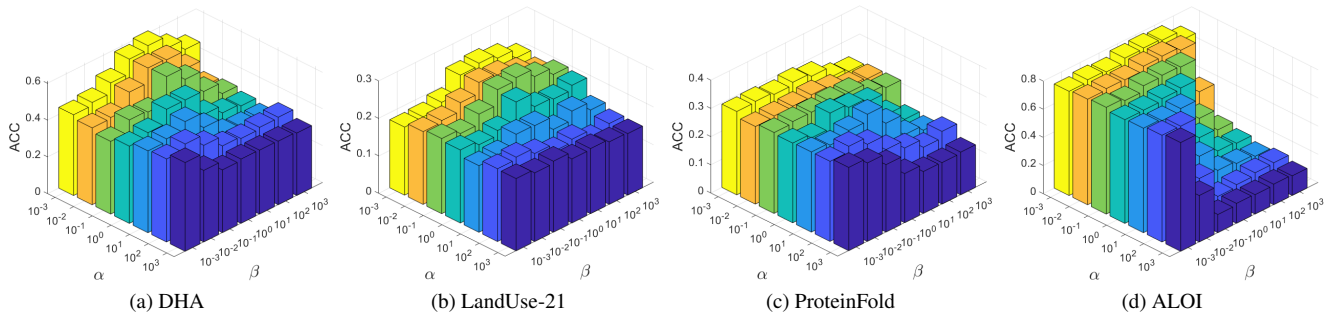

Figure 6. ACC vs.  $\{\alpha, \beta\}$  of GLGC on incomplete + noise setting.

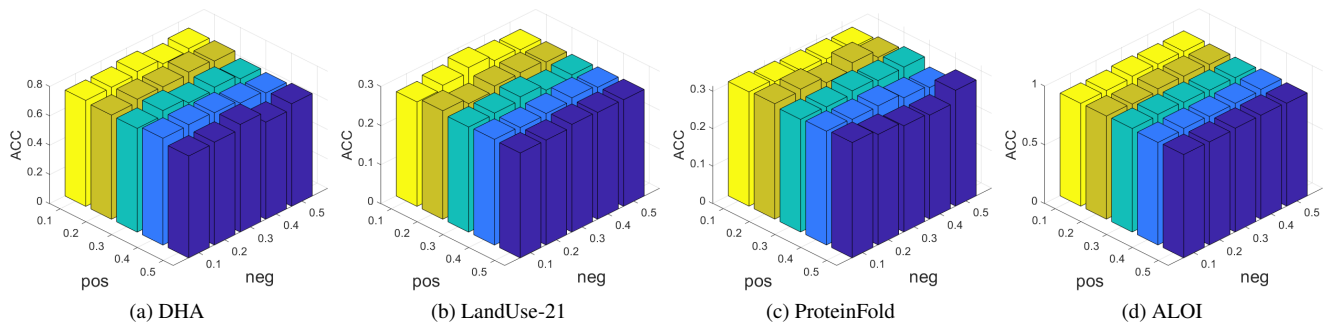

Figure 7. ACC vs.  $\{pos, neg\}$  of GLGC on incomplete setting.

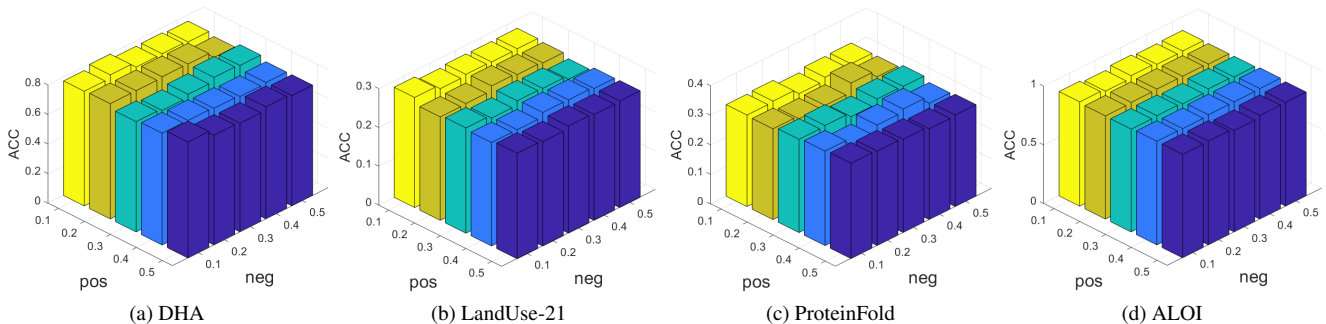

Figure 8. ACC vs.  $\{pos, neg\}$  of GLGC on noise setting.

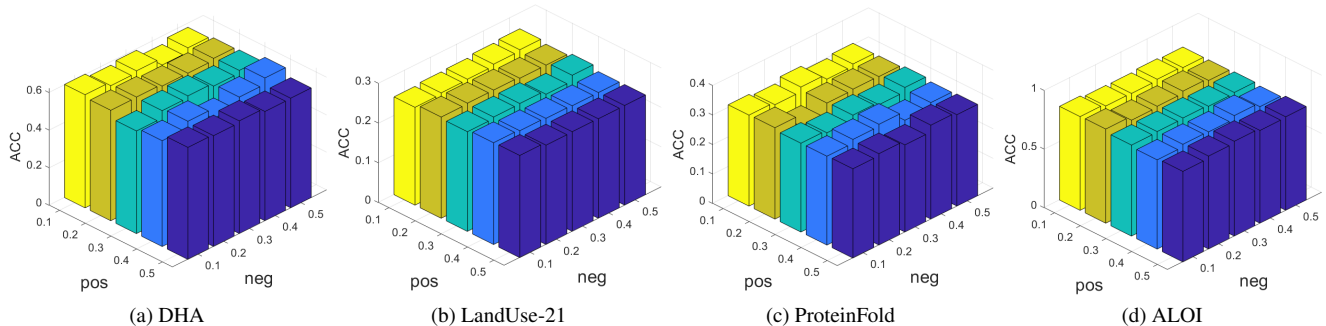

Figure 9. ACC vs.  $\{pos, neg\}$  of GLGC on incomplete + noise setting.
